# Supplementary material
Source: ML conference proceedings conference paper supplement (https://openreview.net/forum?id=_V3kUd_BhGD)

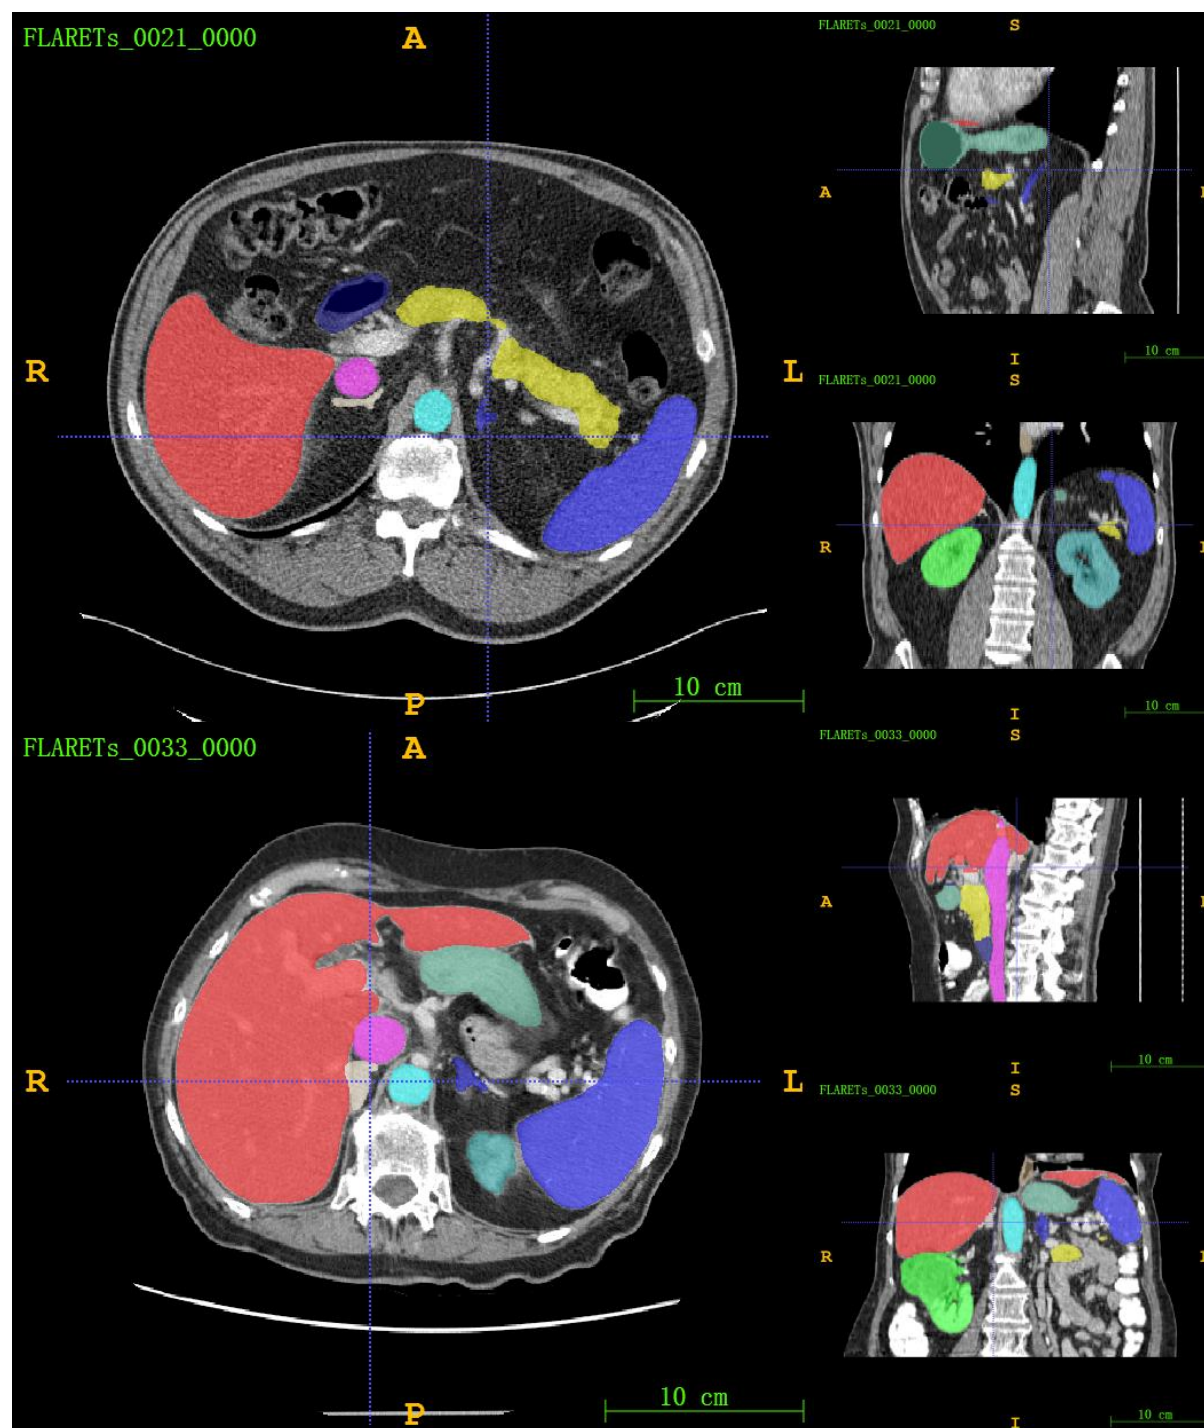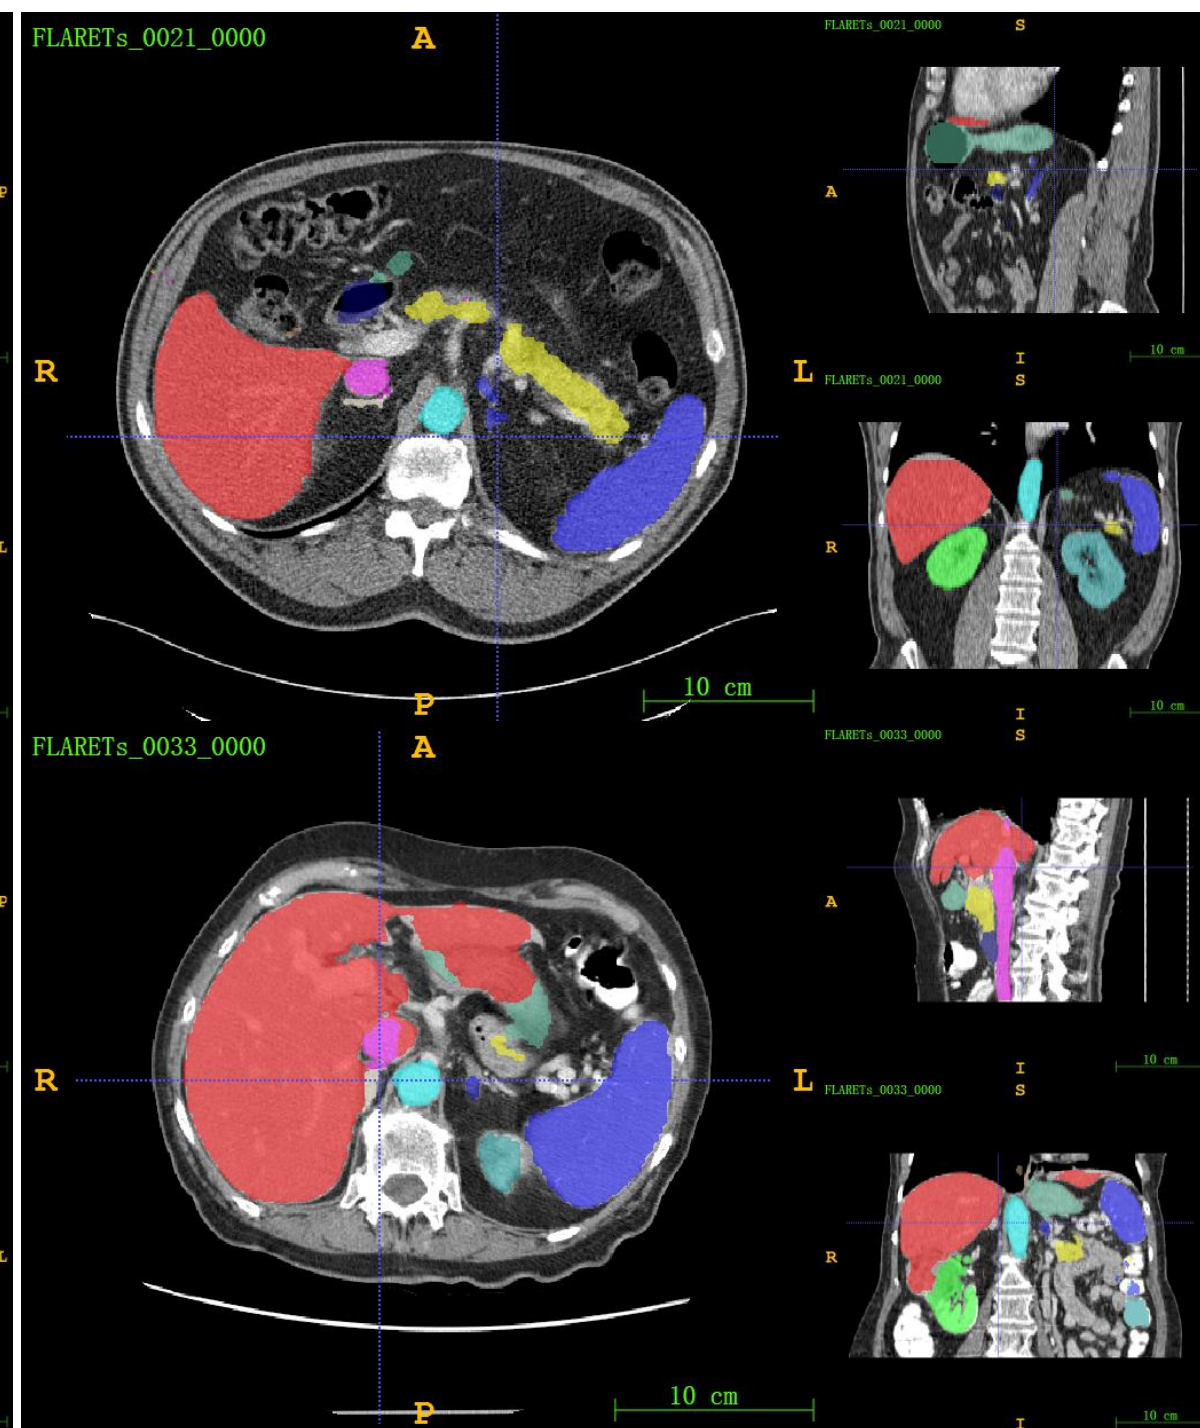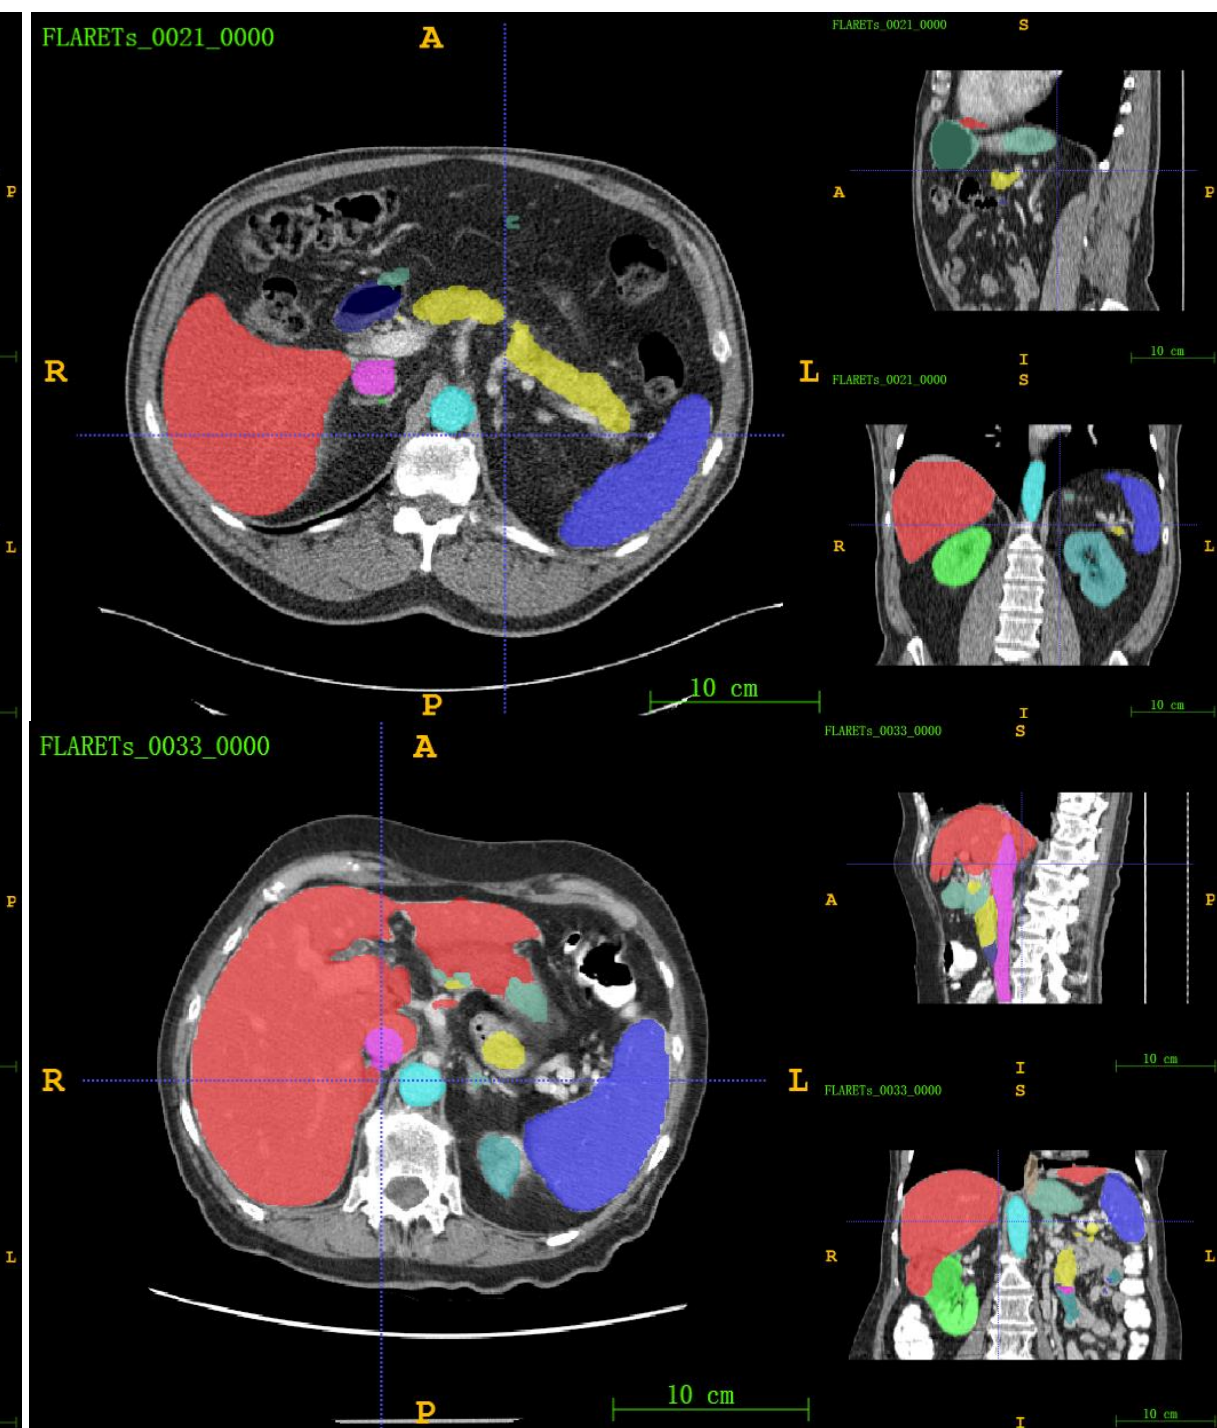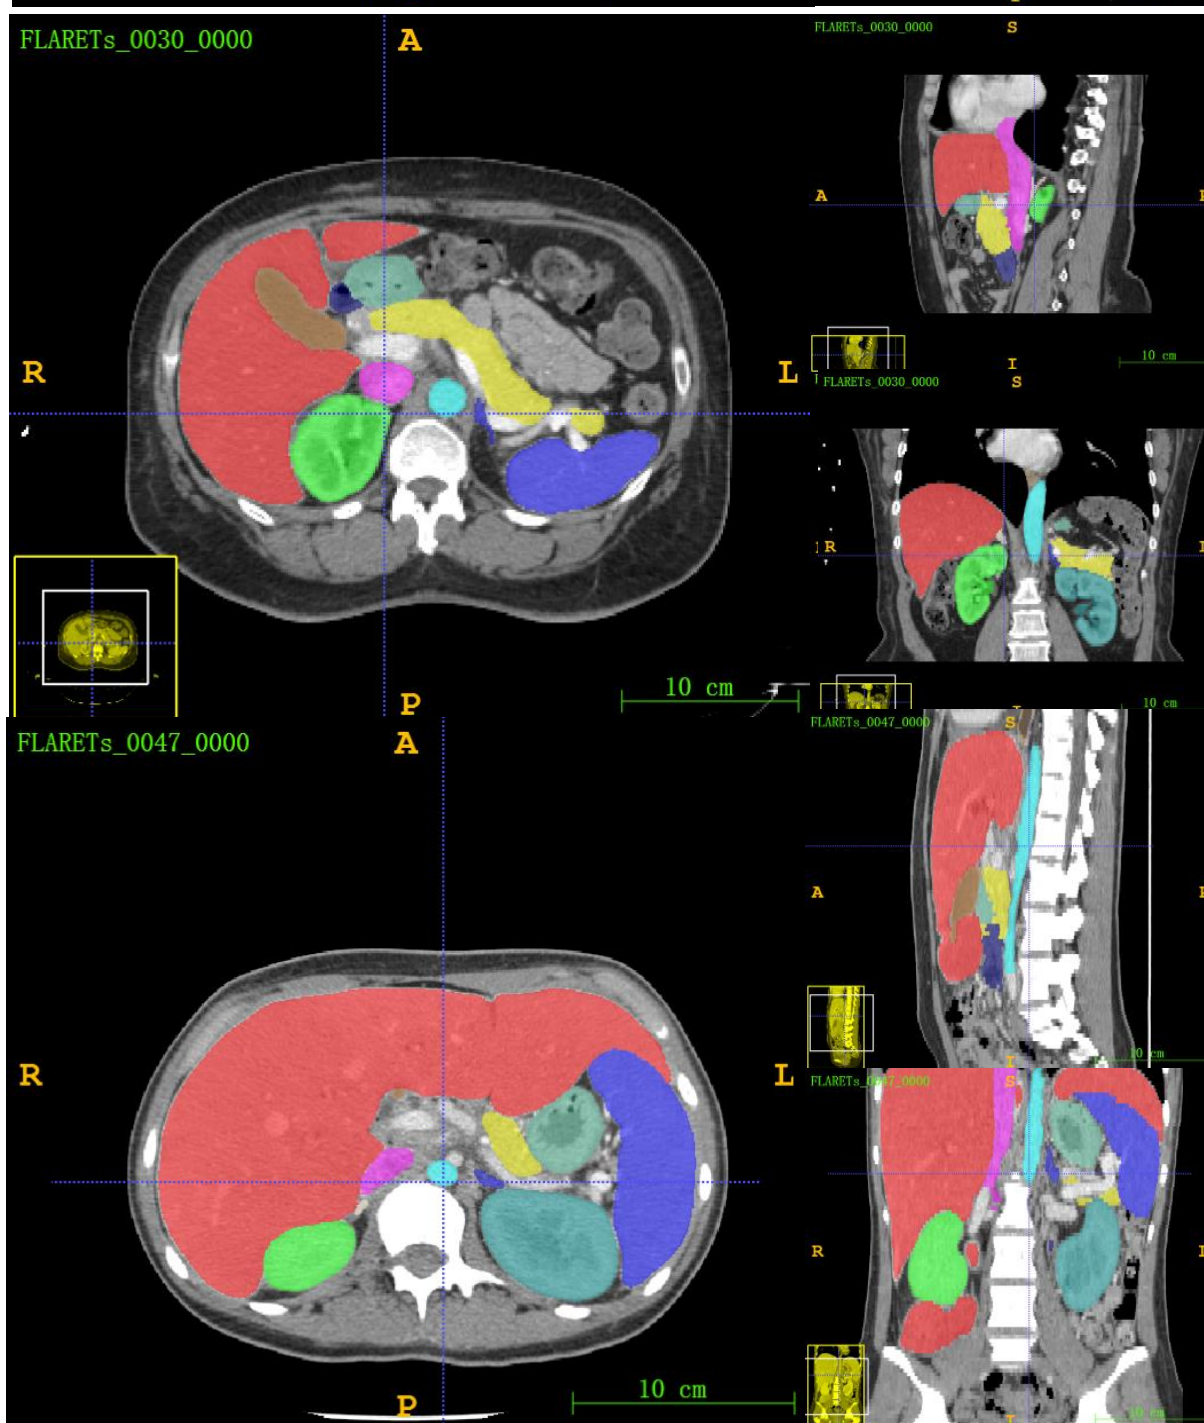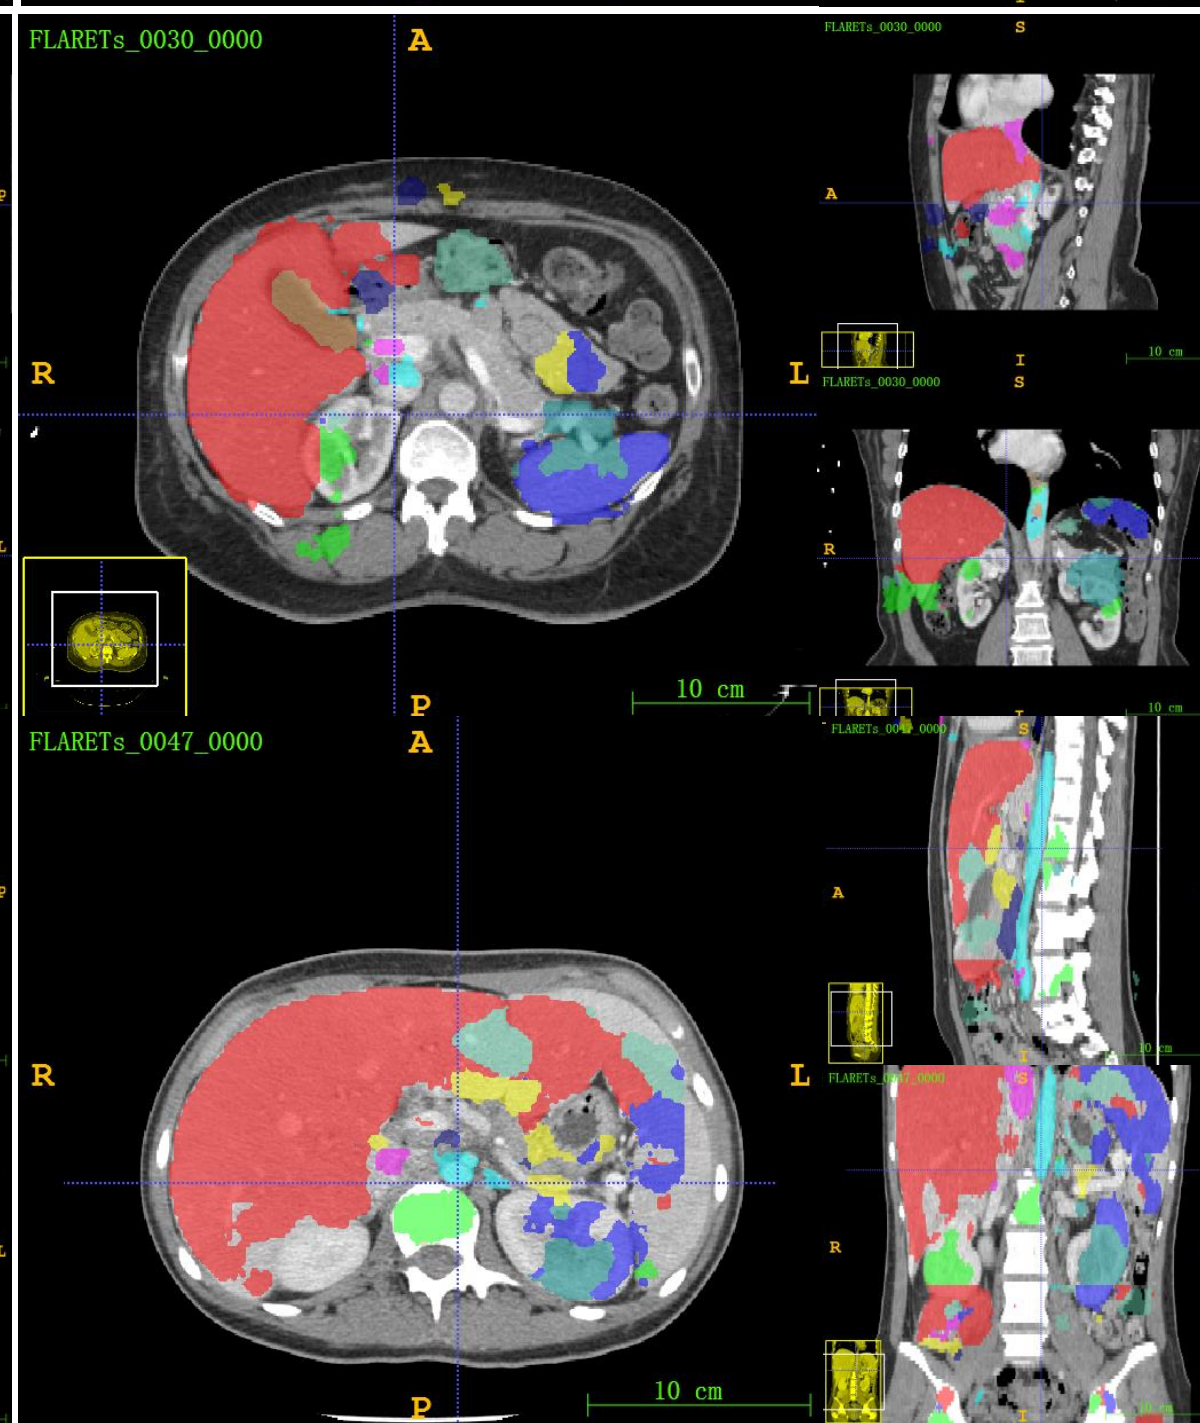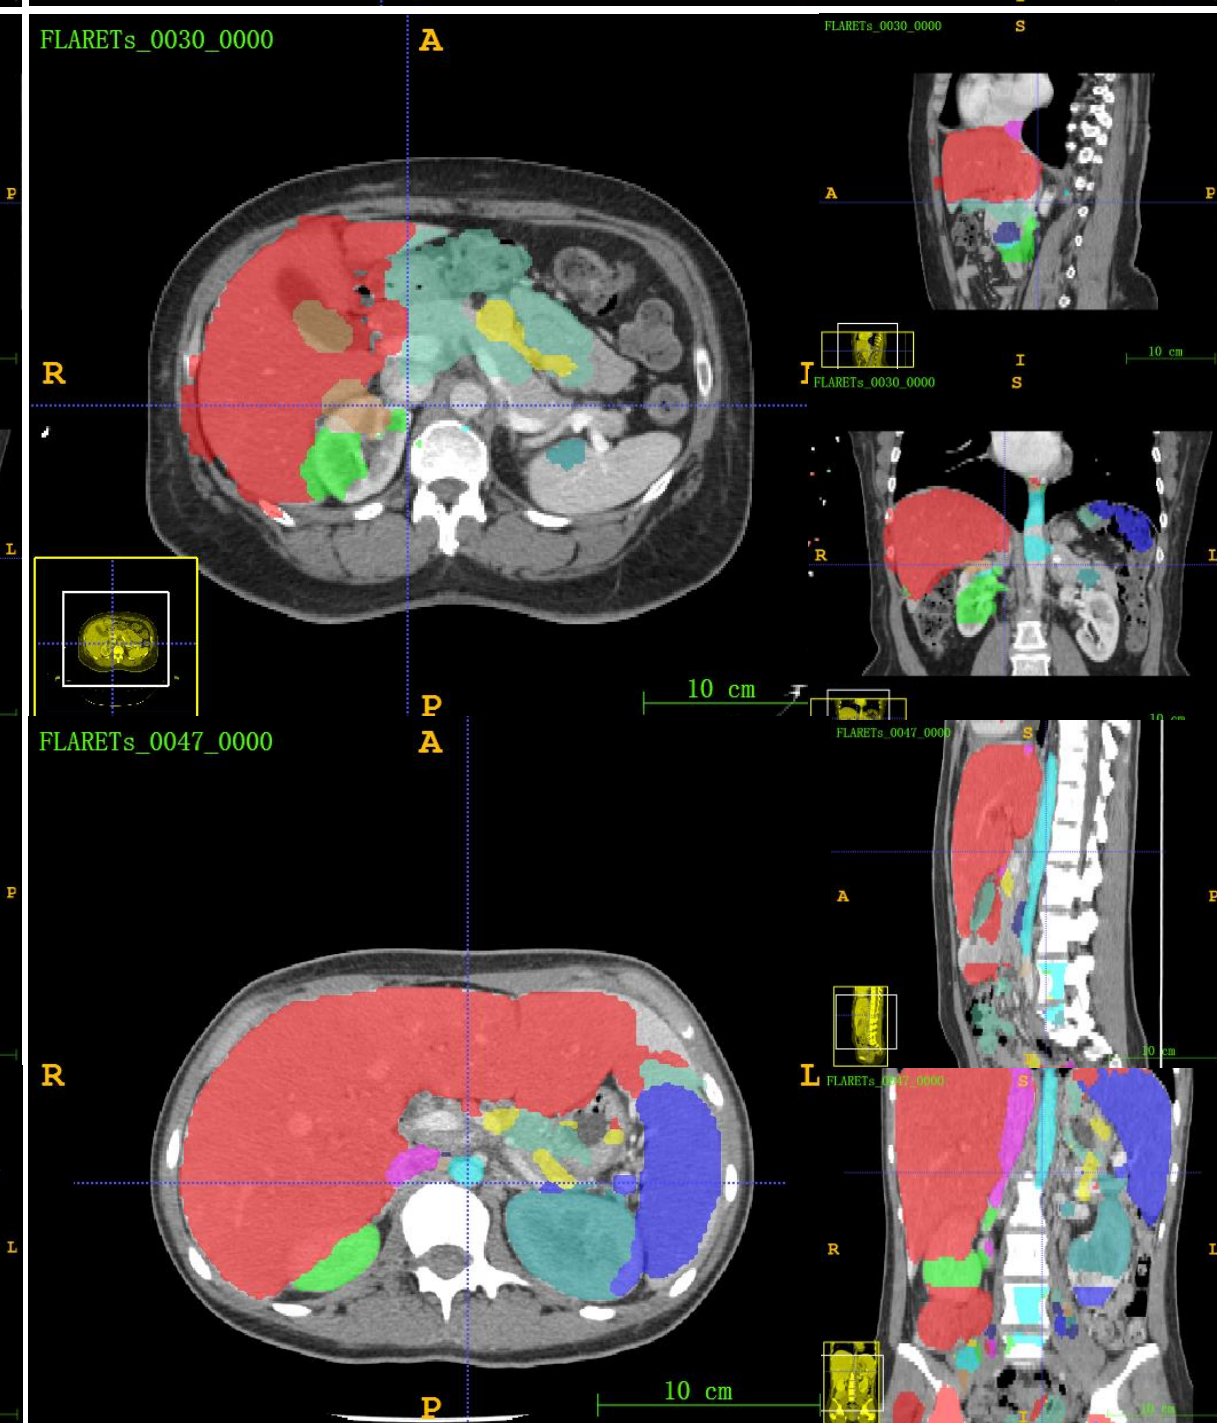

GT

Self-Pretrained

Non-Pretrained

Supplement: supplementary_material [file attachment]

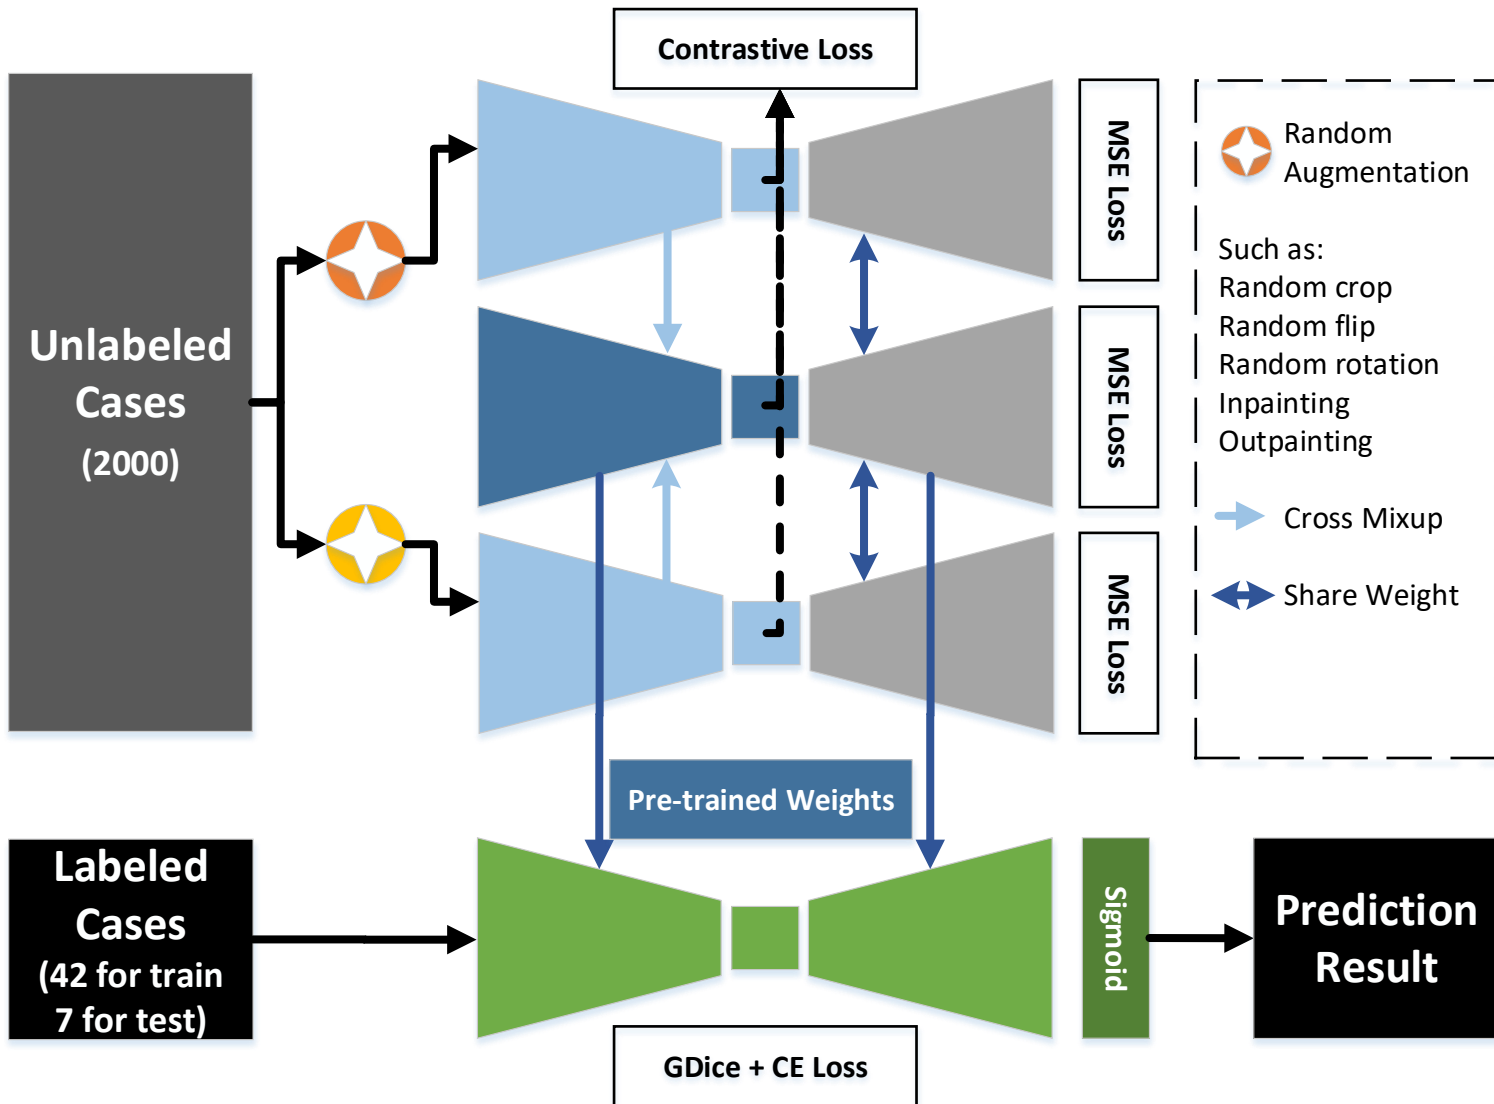

Supplement: supplementary_material [file attachment]

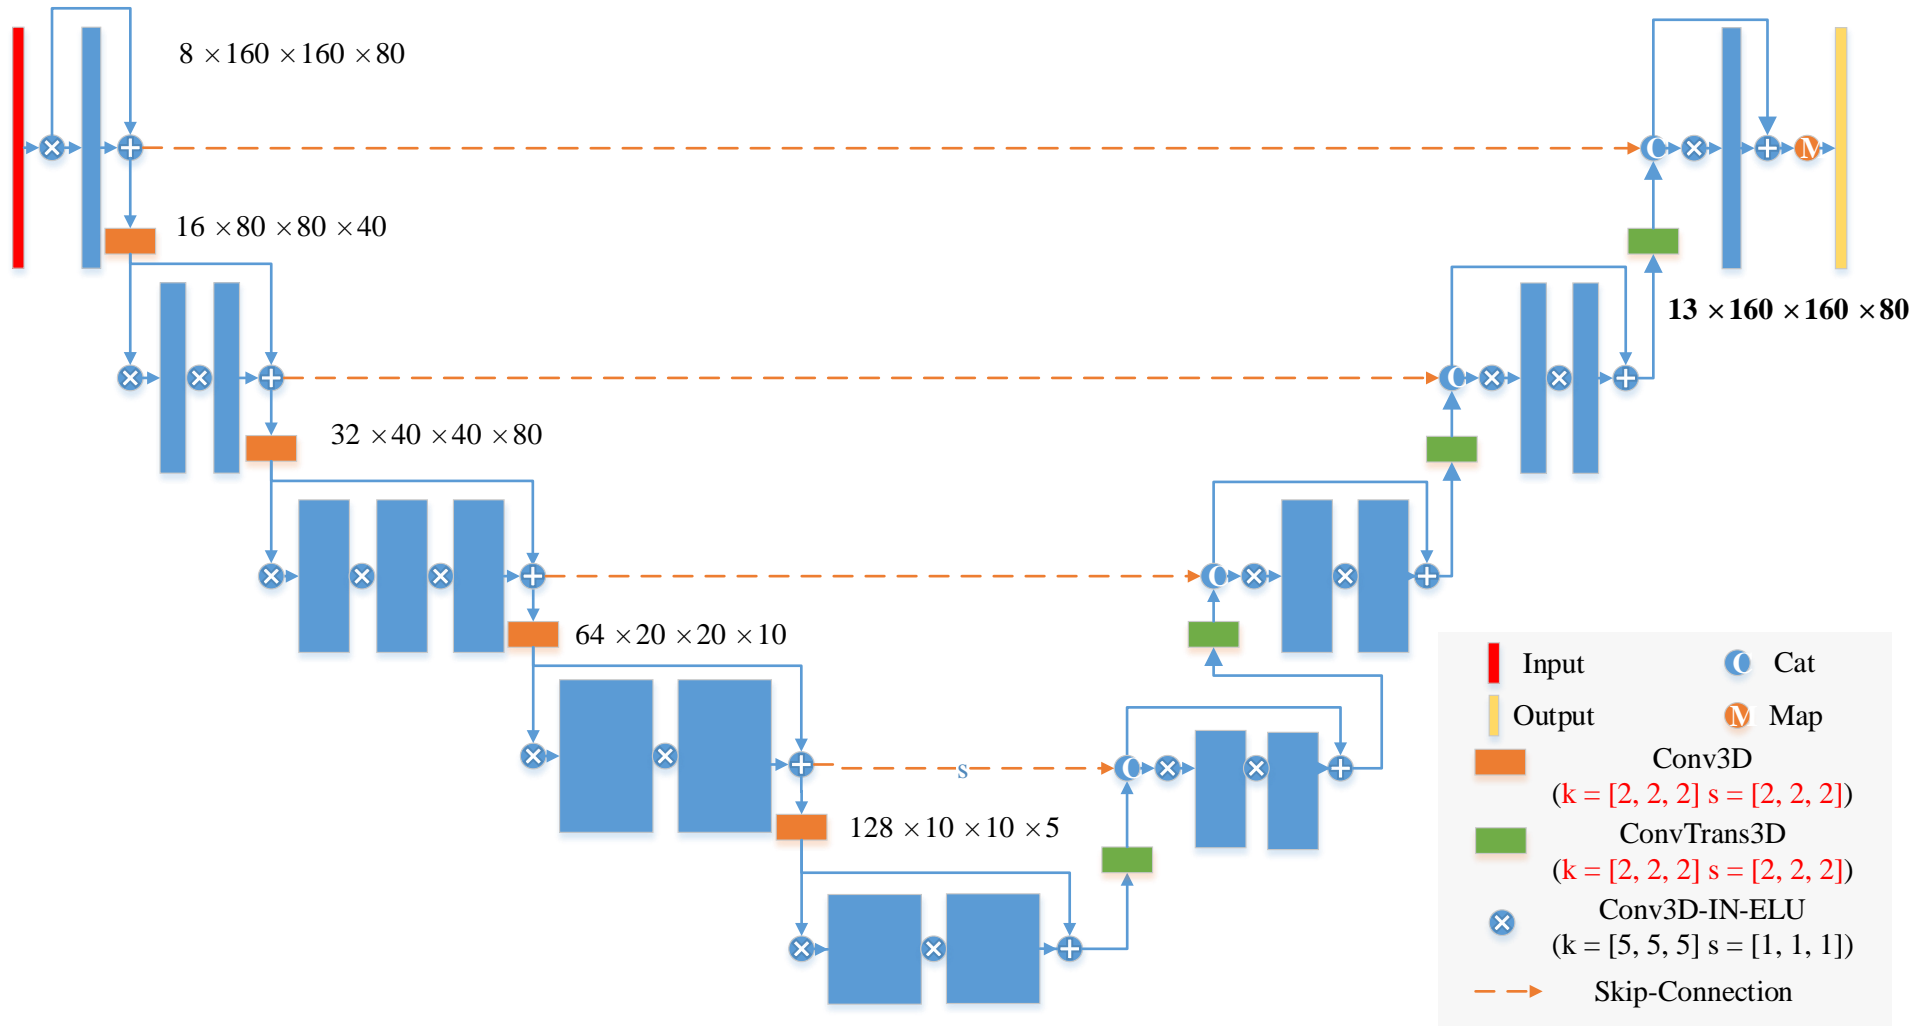

Supplement: supplementary_material [file attachment]

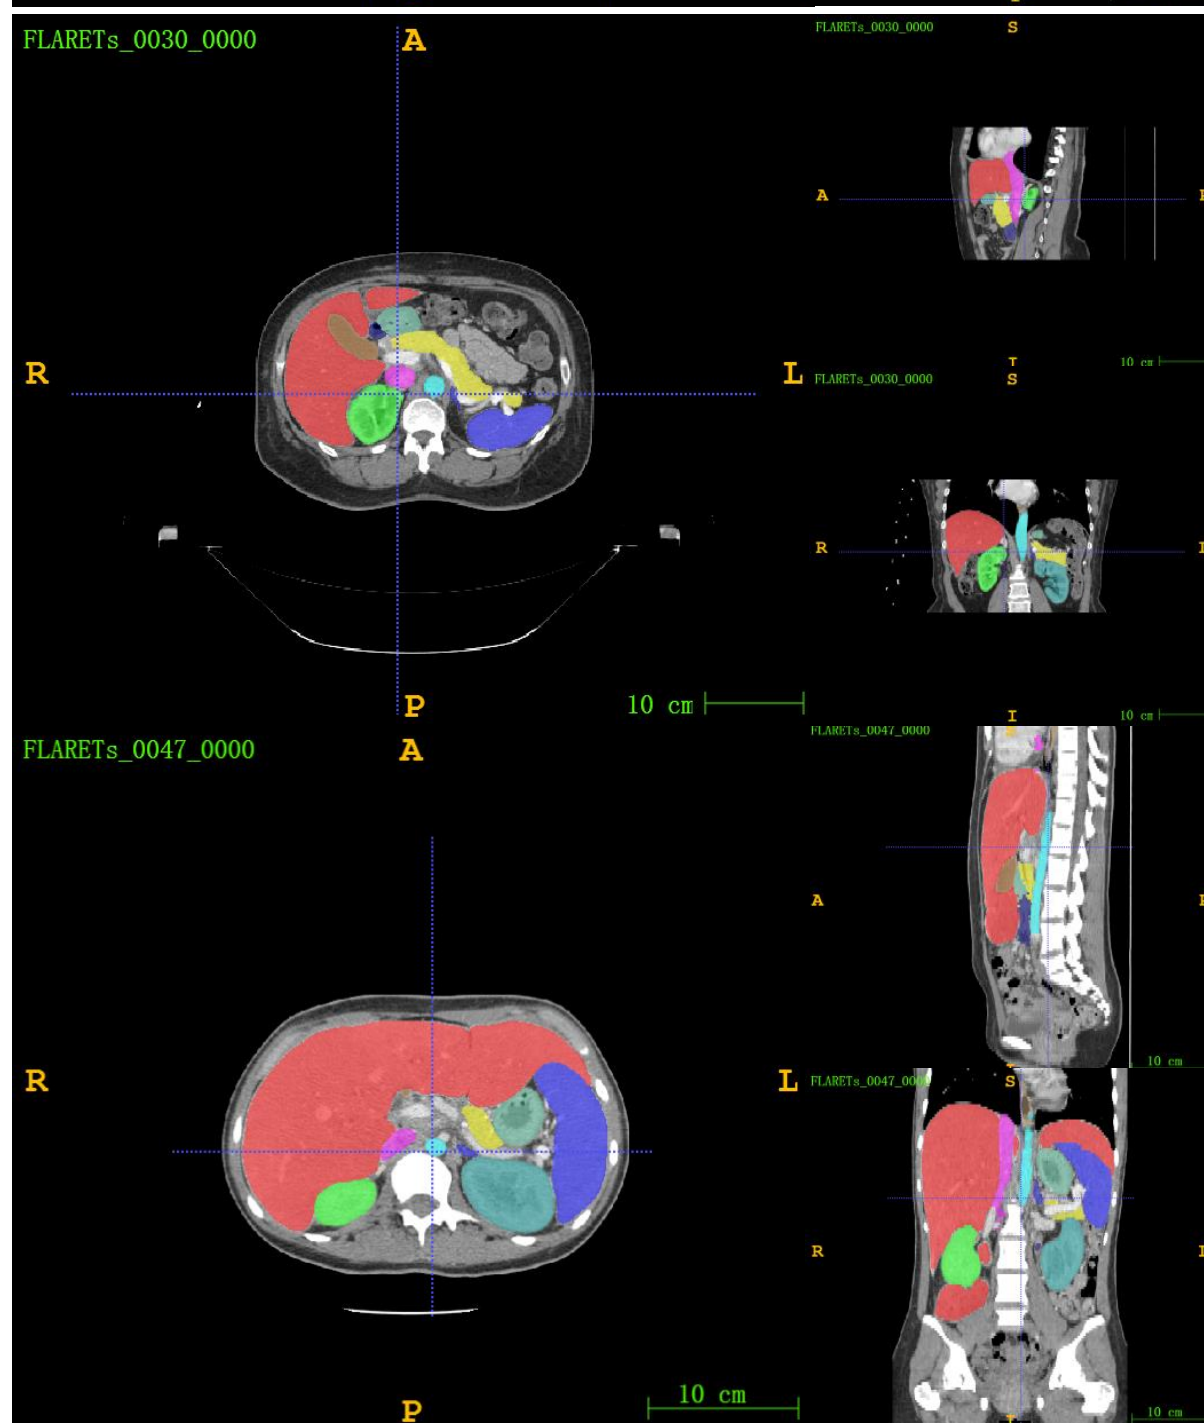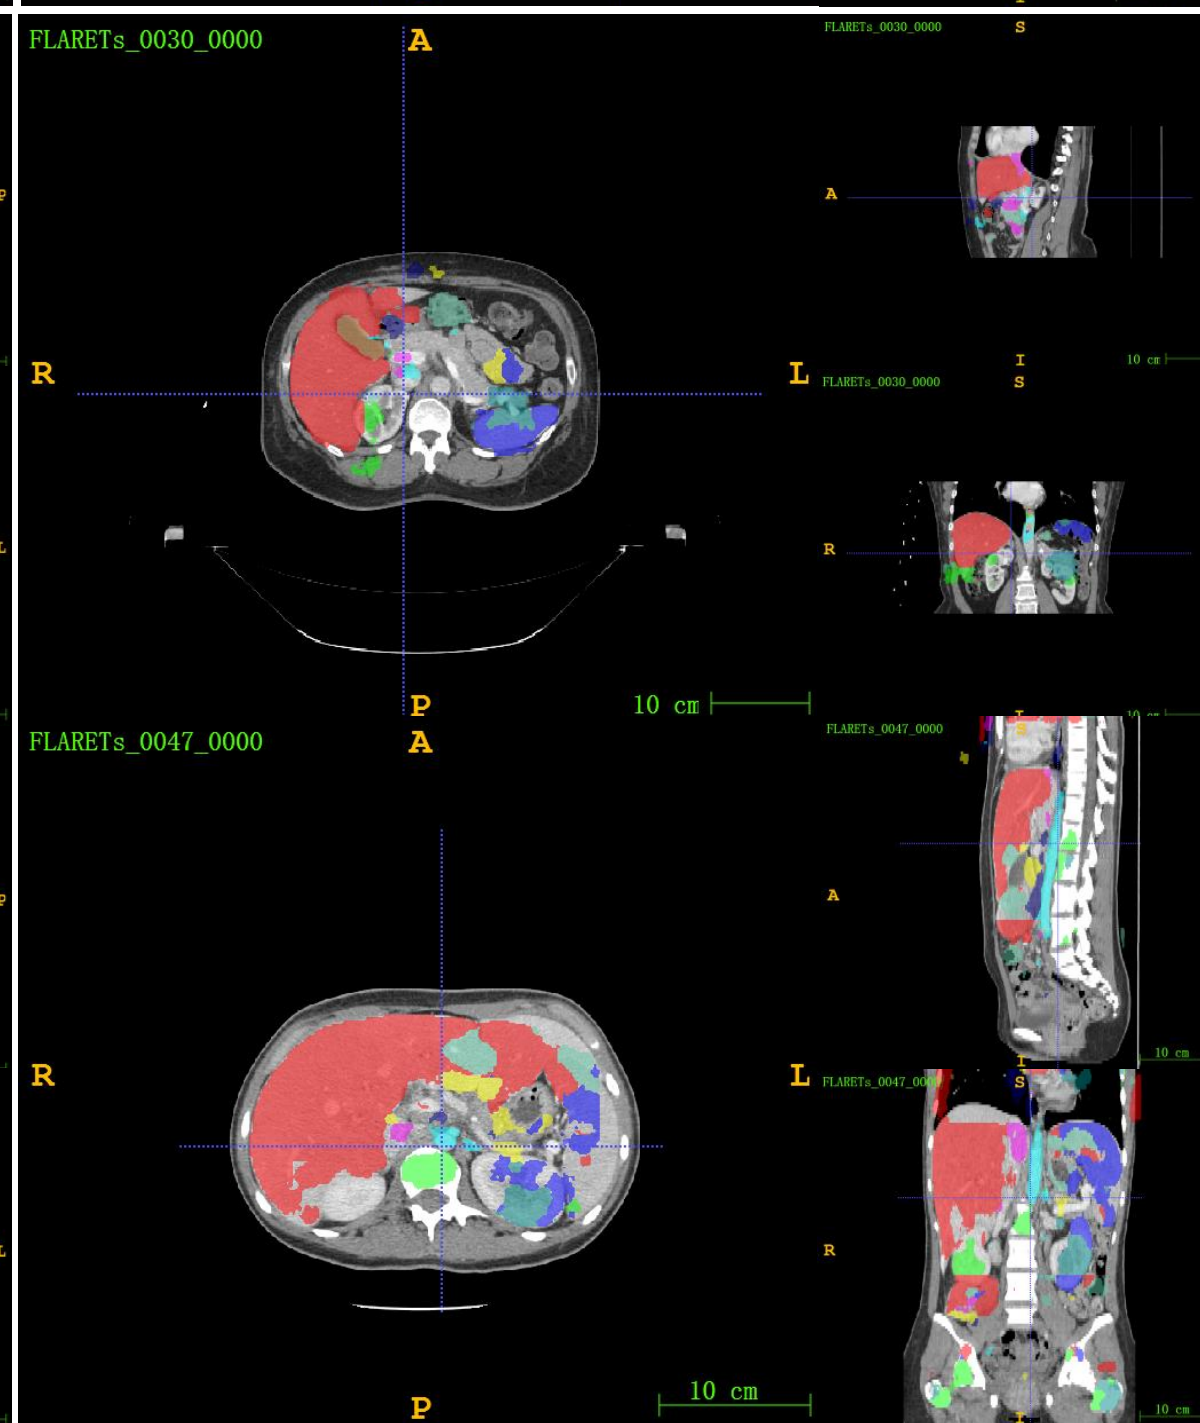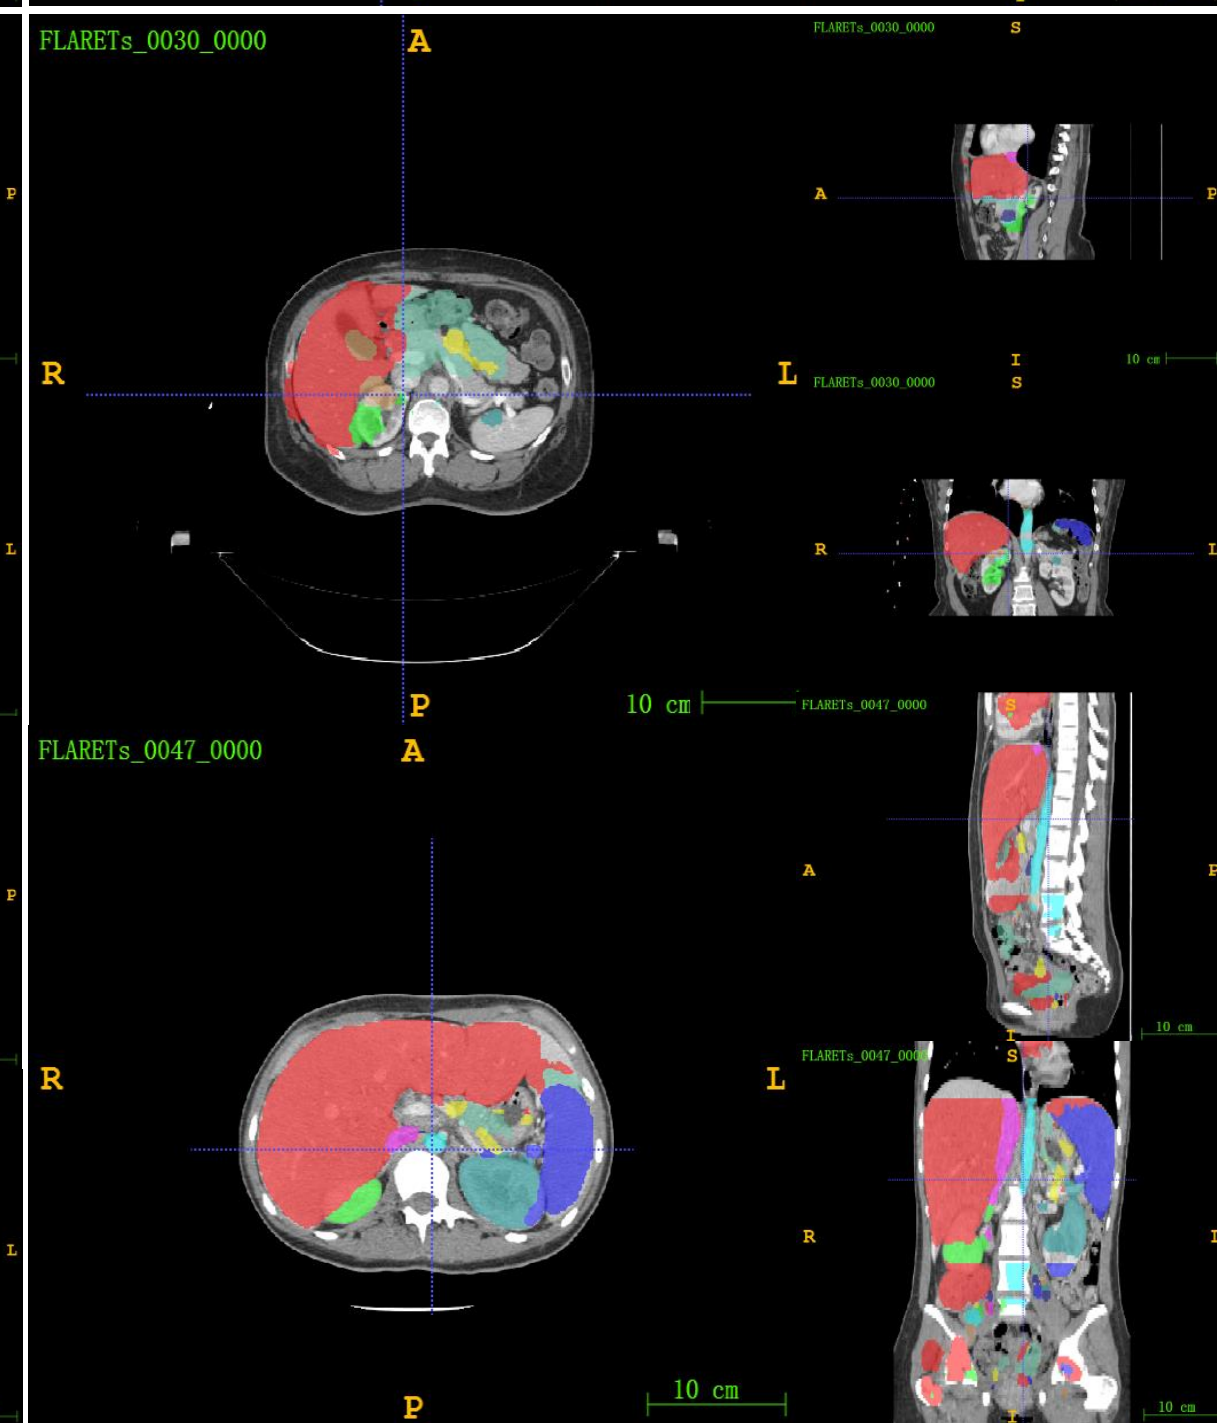

GT

Self-Pretrained

Non-Pretrained

Supplement: supplementary_material [file attachment]
